# Supplementary material
Source: Springer Nature journal article supplement (https://www.springermedizin.de/resource/supplementary/12885_2011_3165_MOESM2_ESM.PDF/9464224)

## Supplementary Figure 2

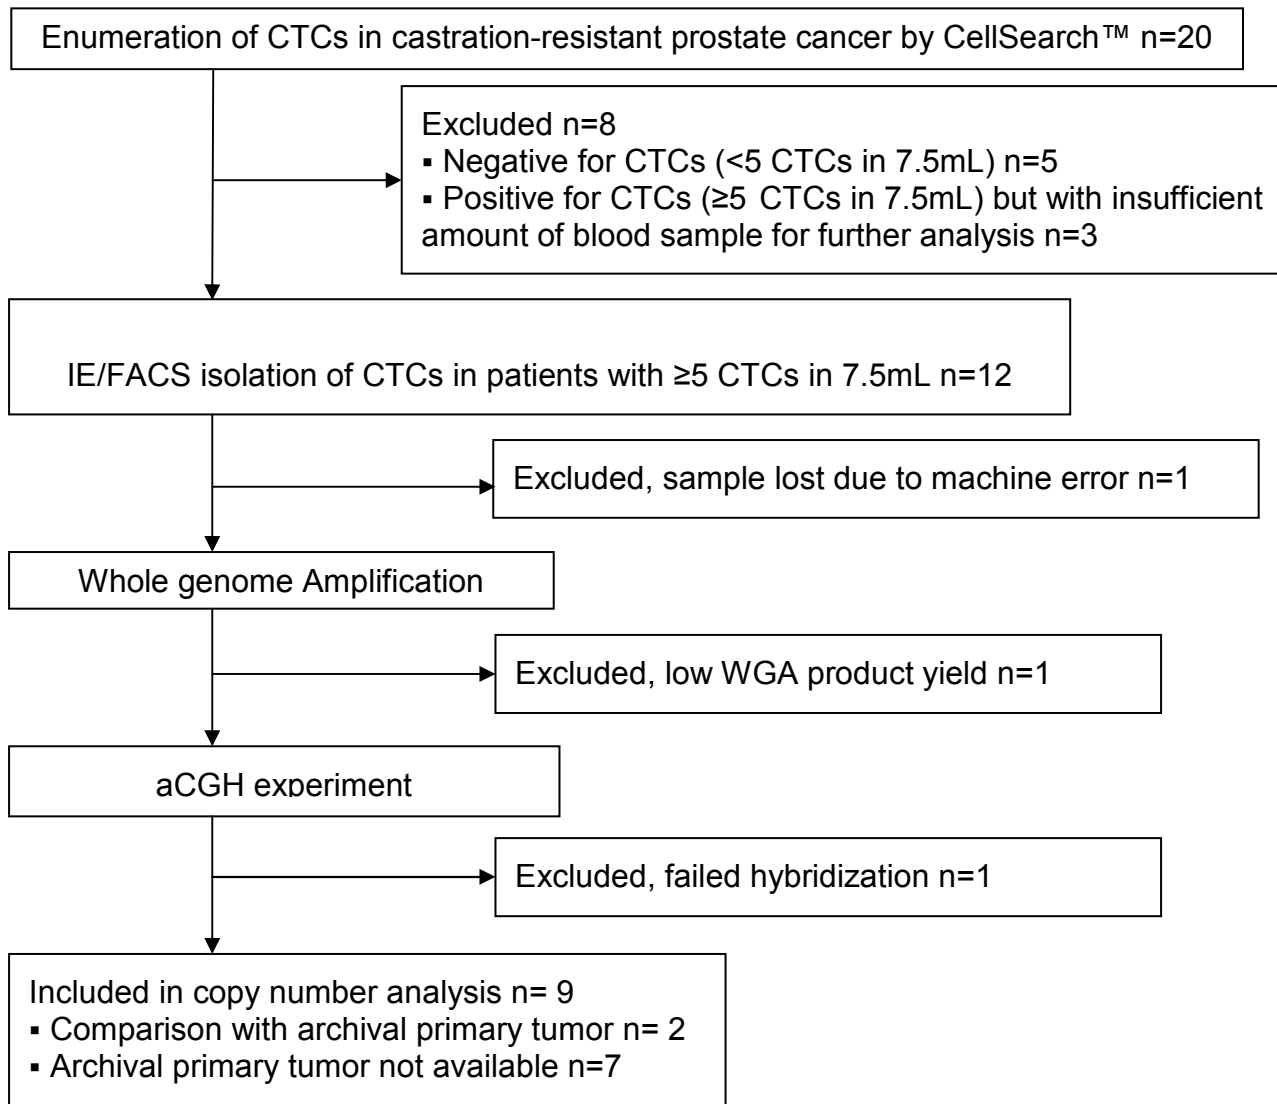

Supplement: MOESM2 [file 9464224]
